# Supplementary material for: Biochar from Agro-Forest Residue: Application Perspective Based on Decision Support Analysis
Source: MDPI journal article supplement (doi:10.3390/app13053240), 2023-03-03
Supplement: s1 [file s1]

**Table S1.** Decision support analysis for biofuel application.

| Solution/Variable                      | Colza* | Cherry stones* | Peach stones | Grape pomace | Softwood* | Sunflower husks* |                                          |
|----------------------------------------|--------|----------------|--------------|--------------|-----------|------------------|------------------------------------------|
| Moisture                               | 5.32   | 4.49           | 4.95         | 2.84         | 5.38      | 9.33             |                                          |
| Ash, db                                | 7.08   | 4.47           | 1.92         | 12.44        | 1.29      | 4.83             |                                          |
| HHV (MJ/kg)                            | 24.49  | 28.62          | 33.34        | 28.11        | 30.88     | 31.05            |                                          |
| Ashes                                  | 7.48   | 4.68           | 2.02         | 12.28        | 1.36      | 5.33             |                                          |
| $E$ (kJ/mol) $10^{\circ}$ - stage<br>2 | 95.21  | 111.9          | 119.2        | 125.2        | 131.7     | 94.1             |                                          |
| $E$ (kJ/mol) $20^{\circ}$ - stage<br>2 | 99.71  | 119.5          | 112.9        | 125.7        | 149.7     | 114.9            |                                          |
| $E$ (kJ/mol) $30^{\circ}$ - stage<br>2 | 86.3   | 110.6          | 84.4         | 91.6         | 160.9     | 96.9             |                                          |
| $E$ (kJ/mol) $40^{\circ}$ - stage<br>2 | 102.4  | 116.6          | 86.3         | 85.6         | 86.9      | 80.2             |                                          |
| $E$ (kJ/mol) $10^{\circ}$ - stage<br>3 | 96.73  | 209.4          | 305.4        | 148.9        | 134.97    | 274.3            |                                          |
| $E$ (kJ/mol) $20^{\circ}$ - stage<br>3 | 100.34 | 208.9          | 231.9        | 172.3        | 196.9     | 166.8            |                                          |
| $E$ (kJ/mol) $30^{\circ}$ - stage<br>2 | 478.3  | 118.1          | 105.4        | 283.2        | 157.1     | 276.2            |                                          |
| $E$ (kJ/mol) $40^{\circ}$ - stage<br>3 | 112.6  | 109.4          | 463.5        | 99.5         | 562.9     | 429.9            |                                          |
| Bulk density (g/cm <sup>3</sup> )      | 0.1585 | 0.4455         | 0.4301       | 0.3737       | 0.2028    | 0.27             |                                          |
|                                        |        |                |              |              |           |                  |                                          |
| Weak dominance                         | 32     | 34             | 42           | 24           | 30        | 34               | Decision<br>results                      |
| Strong dominance                       | 0      | 0              | 0            | 0            | 0         | 0                |                                          |
| Metric (dn)                            | 372.90 | 116.91         | 364.02       | 177.80       | 463.40    | 330.41           | Success rate<br>(worse 0%,<br>best 100%) |
| Weak dominance                         | 49%    | 52%            | 65%          | 37%          | 46%       | 52%              |                                          |
| Strong dominance                       | 0%     | 0%             | 0%           | 0%           | 0%        | 0%               |                                          |
| Metric (dn)                            | 20%    | 75%            | 21%          | 62%          | 0%        | 29%              |                                          |
| TOTAL (Average)                        | 23%    | 42%            | 29%          | 33%          | 15%       | 27%              |                                          |



**Table S3.** Decision support analysis for CO<sub>2</sub> sequestration and soil amendment process application.

| Solution/Variable                    | Colza  | Cherry stones | Peach stones | Grape pomace | Softwood | Sunflower husks | Decision results                      |
|--------------------------------------|--------|---------------|--------------|--------------|----------|-----------------|---------------------------------------|
| C                                    | 78.67  | 76.71         | 76.17        | 73.94        | 82.62    | 65.42           |                                       |
| K                                    | 2.88   | 4.3           | 10.05        | 4.23         | 0.06     | 6.27            |                                       |
| Ca                                   | 2.35   | 1.58          | 0.45         | 2.97         | 0.55     | 8.2             |                                       |
| P                                    | 0.01   | 2.27          | 0.21         | 0.8          | 0.01     | 0.04            |                                       |
| C                                    | 73.52  | 67.01         | 81.56        | 77.61        | 82.35    | 76.76           |                                       |
| S <sub>BET</sub> (m <sup>2</sup> /g) | 252.3  | 265.74        | 306.72       | 293.27       | 331.62   | 278.25          |                                       |
| Bulk density (g/cm <sup>3</sup> )    | 0.1585 | 0.4455        | 0.4301       | 0.3737       | 0.2028   | 0.27            |                                       |
| Electric conductivity (μS/cm)        | 1015   | 372           | 84           | 1960         | 56       | 897             |                                       |
| pH                                   | 9,7    | 9,55          | 9,1          | 11,08        | 8,38     | 9,93            |                                       |
|                                      |        |               |              |              |          |                 |                                       |
| Weak dominance                       | 17     | 23            | 24           | 30           | 18       | 24              | Success rate<br>(worse 0%, best 100%) |
| Strong dominance                     | 0      | 0             | 0            | 0            | 0        | 0               |                                       |
| Metric (dn)                          | 99.56  | 0.51          | 4.33         | 0.81         | 99.56    | 24.56           |                                       |
| Weak dominance                       | 38%    | 51%           | 53%          | 67%          | 40%      | 53%             |                                       |
| Strong dominance                     | 0%     | 0%            | 0%           | 0%           | 0%       | 0%              |                                       |
| Metric (dn)                          | 0%     | 99%           | 96%          | 99%          | 0%       | 75%             |                                       |
| TOTAL (Average)                      | 13%    | 50%           | 50%          | 55%          | 13%      | 43%             |                                       |

**Table S4.** Decision support analysis for supercapacitor process application.

| Solution/Variable                    | Colza  | Cherry stones | Peach stones | Grape pomace | Softwood | Sunflower husks |                                    |
|--------------------------------------|--------|---------------|--------------|--------------|----------|-----------------|------------------------------------|
| C                                    | 78.67  | 76.71         | 76.17        | 73.94        | 82.62    | 65.42           |                                    |
| K                                    | 2.88   | 4.3           | 10.05        | 4.23         | 0.06     | 6.27            |                                    |
| Ca                                   | 2.35   | 1.58          | 0.45         | 2.97         | 0.55     | 8.2             |                                    |
| P                                    | 0.01   | 2.27          | 0.21         | 0.8          | 0.01     | 0.04            |                                    |
| C                                    | 73.52  | 67.01         | 81.56        | 77.61        | 82.35    | 76.76           |                                    |
| S <sub>BET</sub> (m <sup>2</sup> /g) | 252.3  | 265.74        | 306.72       | 293.27       | 331.62   | 278.25          |                                    |
| Bulk density (g/cm <sup>3</sup> )    | 0.1585 | 0.4455        | 0.4301       | 0.3737       | 0.2028   | 0.27            |                                    |
| Electric conductivity (μS/cm)        | 1015   | 372           | 84           | 1960         | 56       | 897             |                                    |
| Salt content (ppm)                   | 508    | 186           | 42           | 980          | 28       | 448             |                                    |
|                                      |        |               |              |              |          |                 |                                    |
| Weak dominance                       | 18     | 23            | 24           | 30           | 18       | 23              | Decision results                   |
| Strong dominance                     | 0      | 0             | 0            | 0            | 0        | 0               |                                    |
| Metric (dn)                          | 99.56  | 0.51          | 4.32         | 0.81.        | 99.56    | 24.56           |                                    |
| Weak dominance                       | 40%    | 51%           | 53%          | 67%          | 40%      | 51%             | Success rate (worse 0%, best 100%) |
| Strong dominance                     | 0%     | 0%            | 0%           | 0%           | 0%       | 0%              |                                    |
| Metric (dn)                          | 0%     | 99%           | 96%          | 99%          | 0%       | 75%             |                                    |
| TOTAL (Average)                      | 13%    | 50%           | 50%          | 55%          | 13%      | 42%             |                                    |
